# Supplementary material
Source: PubMed Central journal article supplement (PMC5288816)
Supplement: AEM.03044-16_zam999117654s1.pdf [file AEM.03044-16_zam999117654s1.pdf]

**A Highly Expressed High Molecular Weight S-Layer Complex of  
*Pelosinus* Strain UFO1 Binds Uranium**

Michael P. Thorgersen<sup>a</sup>, W. Andrew Lancaster<sup>a</sup>, Lara Rajeev<sup>b</sup>, Xiaoxuan Ge<sup>a</sup>, Brian J. Vaccaro<sup>a</sup>,  
Farris L. Poole<sup>a</sup>, Adam P. Arkin<sup>b</sup>, Aindrila Mukhopadhyay<sup>b</sup>, and Michael W. W. Adams<sup>a#</sup>

<sup>a</sup>Department of Biochemistry & Molecular Biology, University of Georgia, Athens, GA, 30602

<sup>b</sup> Lawrence Berkeley National Laboratory, Berkeley, CA 94720

**Supplementary Material**

**Tables S1 – S6**

**Figures S1 – S3**

**Supplementary Table 1: Purification of UBC from a cell membrane and cytoplasmic fraction.** Cell extract was prepared (as described in the Methods) from 20 g cells. Values for the DEAE FF column are taken from the flow through fraction that was concentrated and loaded onto the Superose 6 column. Values for the Superose 6 column are taken from the peak uranium fractions (6 and 7).

| Purification Step | Protein (mg) | Uranium ( $\mu\text{mol}$ ) | % Yield | Fold Purification | Uranium/Protein Dimer |
|-------------------|--------------|-----------------------------|---------|-------------------|-----------------------|
| Cell Extract      | 145.0        | 0.87                        | 100     | 1.0               | 0.6                   |
| DEAE FF           | 32.0         | 0.47                        | 54.0    | 2.5               | 1.4                   |
| Superose 6        | 0.4          | 0.01                        | 2.6     | 2.4               | 3.3                   |
| Final             |              |                             | 1.1     | 5.8               |                       |

**Supplementary Table 2: Expression levels and conserved domains of *Pelosinus sp.* strain UFO1 genes with homology to the uranium binding complex genes UFO1\_4202 and UFO1\_4203.**

| Gene      | Expression            | Fold change with U addition | P <sub>adj</sub> | UFO1_4202<br>% Identity<br>(% Coverage) | UFO1_4203<br>% Identity<br>(% Coverage) | Length<br>(Amino Acids) | S-layer domain | OprB superfamily | OM_channels superfamily | DUF3373 |
|-----------|-----------------------|-----------------------------|------------------|-----------------------------------------|-----------------------------------------|-------------------------|----------------|------------------|-------------------------|---------|
| UFO1_4206 | 8.9 x 10 <sup>0</sup> | 1.71                        | 0.69             | 41 (47)                                 | 47 (52)                                 | 376                     | Yes            | No               | No                      | No      |
| UFO1_0809 | 1.7 x 10 <sup>1</sup> | 0.86                        | 0.93             | 36 (93)                                 | 32 (99)                                 | 487                     | Yes            | No               | No                      | Yes     |
| UFO1_1298 | 1.8 x 10 <sup>1</sup> | 1.29                        | 0.78             | 55 (26)                                 | 49 (30)                                 | 446                     | Yes            | No               | No                      | No      |
| UFO1_4762 | 4.7x 10 <sup>1</sup>  | 0.89                        | 0.8              | 60 (29)                                 | 39 (100)                                | 449                     | Yes            | No               | No                      | No      |
| UFO1_1594 | 4.7 x 10 <sup>1</sup> | 1.48                        | 0.4              | 23 (85)                                 | 23 (93)                                 | 397                     | No             | No               | No                      | Yes     |
| UFO1_0175 | 1.7 x 10 <sup>2</sup> | 0.92                        | 0.9              | 33 (100)                                | 35 (100)                                | 420                     | Yes            | No               | No                      | No      |
| UFO1_3545 | 4.3 x 10 <sup>2</sup> | 1.03                        | 0.98             | 33 (100)                                | 30 (100)                                | 439                     | No             | No               | No                      | No      |
| UFO1_3576 | 6.3 x 10 <sup>2</sup> | 1.04                        | 1                | 28 (100)                                | 28 (100)                                | 463                     | Yes            | No               | No                      | No      |
| UFO1_4203 | 5.0 x 10 <sup>4</sup> | 0.96                        | 0.87             | 100 (100)                               | 39 (100)                                | 457                     | Yes            | No               | Yes                     | Yes     |
| UFO1_4202 | 1.1 x 10 <sup>5</sup> | 0.68                        | 0.1              | 39 (100)                                | 100 (100)                               | 414                     | Yes            | Yes              | No                      | No      |

**Supplementary Table 3: Purification of UBC from extracellular spent medium.** Extracellular spent medium (3L) was prepared as described in the Methods. Values for the DEAE FF column are taken from peak fractions 11-15 which were concentrated and loaded onto the Superose 6 column. Values for the Superose 6 column are taken from the peak uranium fraction (6).

| Purification Step | Protein (mg) | Uranium ( $\mu\text{mol}$ ) | % Yield | Fold Purification | Uranium/Protein Dimer |
|-------------------|--------------|-----------------------------|---------|-------------------|-----------------------|
| Cell Extract      | 435.5        | 1.9                         | 100     | 1.0               | 0.4                   |
| DEAE FF           | 363.3        | 0.3                         | 13.8    | 0.2               | 0.1                   |
| Superose 6        | 0.1          | 0.0004                      | 0.2     | 4.7               | 0.3                   |
| Final             |              |                             | 0.02    | 0.8               |                       |

**Supplementary Table 4: Metal analysis of peak fraction from extracellular UBC size exclusion column.**

| Metal | Concentration ( $\mu\text{M}$ ) | Overlap with U peak |
|-------|---------------------------------|---------------------|
| Ti    | 0.14                            | Yes                 |
| V     | 0.02                            | Yes                 |
| Cr    | 0.04                            | No                  |
| Mn    | 0.00                            | No                  |
| Fe    | 0.10                            | No                  |
| Co    | 0.08                            | Yes                 |
| Ni    | 2.09                            | No                  |
| Cu    | 0.02                            | No                  |
| Zn    | 0.88                            | No                  |
| Mo    | 0.00                            | No                  |
| Cd    | 0.00                            | No                  |
| W     | 0.02                            | Yes                 |
| Pb    | 0.00                            | No                  |
| U     | 0.88                            | No                  |

**Supplementary Table 5: Most highly transcribed genes of *Pelosinus sp.* strain UFO1.**

| Gene      | Expression level (Counts) | Fold change with U addition | P <sub>adj</sub> | Gene Description                            |
|-----------|---------------------------|-----------------------------|------------------|---------------------------------------------|
| UFO1_4202 | 1.1E+05                   | 0.7                         | 0.10             | S-layer domain-containing protein           |
| UFO1_2336 | 8.1E+04                   | 1.2                         | 0.57             | Manganese/iron superoxide dismutase         |
| UFO1_4203 | 5.0E+04                   | 1.0                         | 0.87             | S-layer domain-containing protein           |
| UFO1_3815 | 3.9E+04                   | 1.3                         | 0.34             | Tetratricopeptide repeat-containing protein |
| UFO1_0431 | 3.9E+04                   | 1.2                         | 0.39             | Formate acetyltransferase                   |
| UFO1_4131 | 3.8E+04                   | 1.4                         | 0.42             | Linocin M18 bacteriocin protein             |
| UFO1_4086 | 3.5E+04                   | 0.5                         | 0.00             | Sigma 54 protein/ribosomal protein S30EA    |
| UFO1_4132 | 3.5E+04                   | 1.1                         | 0.92             | Rubrerythrin                                |
| UFO1_3888 | 3.3E+04                   | 0.6                         | 0.01             | 5-carboxymethyl-2-hydroxymuconate isomerase |
| UFO1_1284 | 3.3E+04                   | 1.0                         | 0.98             | Chaperonin (60 kDa)                         |
| UFO1_4112 | 3.3E+04                   | 1.1                         | 0.86             | Flagellin domain protein                    |
| UFO1_3290 | 2.6E+04                   | 1.2                         | 0.67             | Nitroreductase                              |
| UFO1_0294 | 2.5E+04                   | 1.3                         | 0.57             | Peptidase M10A and M12B                     |
| UFO1_0970 | 2.3E+04                   | 0.8                         | 0.29             | Pyridoxamine 5-phosphate oxidase            |
| UFO1_3291 | 2.2E+04                   | 0.8                         | 0.57             | Hypothetical protein                        |

**Supplementary Table 6: *Pelosinus sp.* strain UFO1 genes with over 8-fold increased expression in cells grown in the presence of 50  $\mu$ M uranium.**

| Gene      | Expression (no U) | Expression (50 $\mu$ M U) | Fold Change | $p_{\text{adj}}$ | Gene Description     |
|-----------|-------------------|---------------------------|-------------|------------------|----------------------|
| UFO1_3682 | 87                | 2357                      | 27.2        | 0.30             | Hypothetical protein |
| UFO1_1409 | 38                | 802                       | 21.4        | 0.33             | Hypothetical protein |
| UFO1_3260 | 195               | 3074                      | 15.7        | 0.17             | Hypothetical protein |
| UFO1_2742 | 243               | 3025                      | 12.5        | 0.20             | Hypothetical protein |
| UFO1_2808 | 698               | 8560                      | 12.3        | 0.14             | Hypothetical protein |
| UFO1_3253 | 428               | 3667                      | 8.6         | 0.30             | Hypothetical protein |
| UFO1_1596 | 615               | 4780                      | 7.8         | 0.20             | Hypothetical protein |

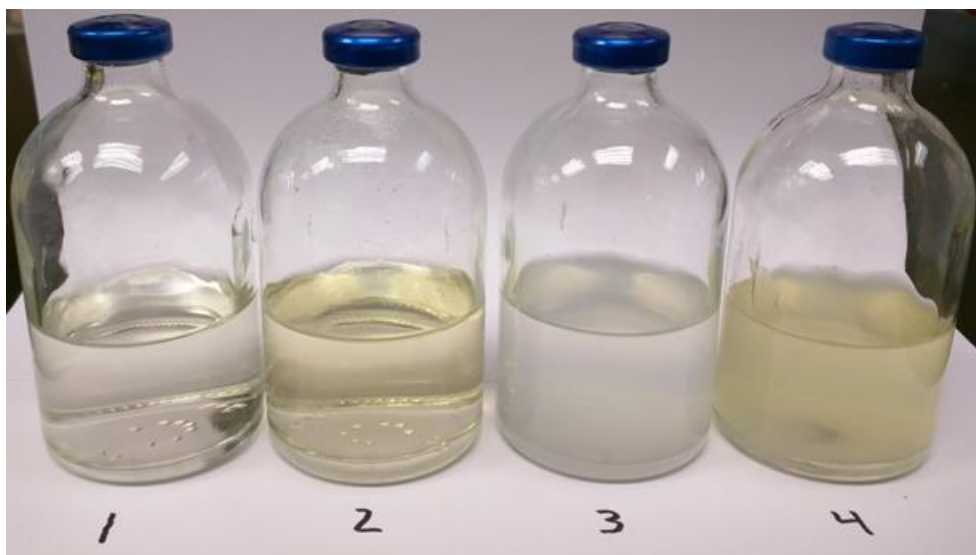

**Supplementary Figure 1: *Pelosinus* strain UFO1 reduces anthraquinone-2,6-disulfonate (AQDS) to AH<sub>2</sub>DS during growth.** When reduced to AH<sub>2</sub>DS, AQDS changes color to a deeper yellow/orange as seen in bottles 2 and 4 (1). 1) Uninoculated medium containing 100  $\mu$ M AQDS. 2) Uninoculated medium containing 100  $\mu$ M AH<sub>2</sub>DS. 3) Strain UFO1 culture with no AQDS added to the growth medium. 4) Strain UFO1 culture with 100  $\mu$ M AQDS added to the growth medium.



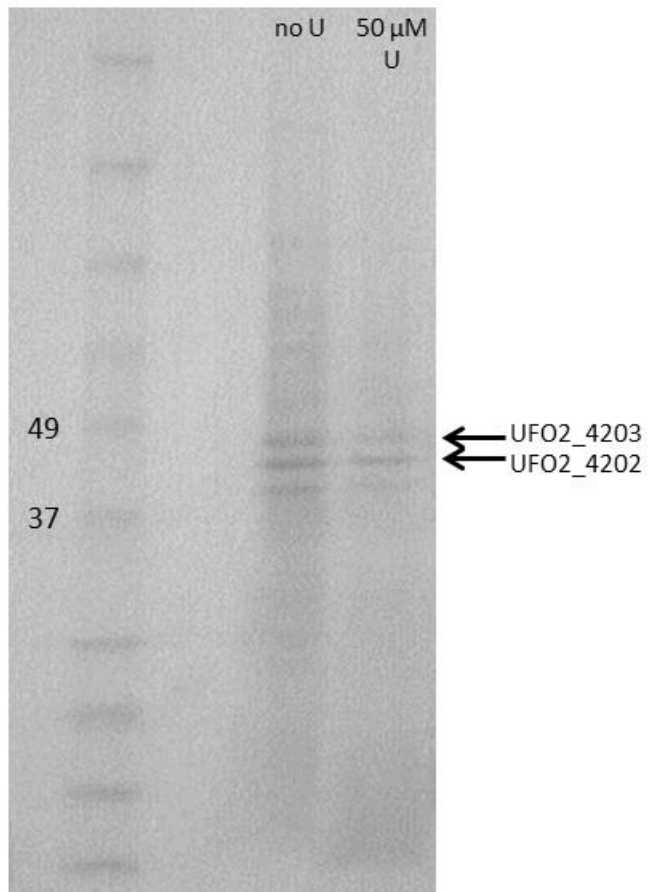

**Supplementary Figure 2: The uranium binding complex (UBC) is present in the spent medium of cultures of *Pelosinus sp.* strain UFO1.** Strain UFO1 was grown in modified R2 broth with and without 50 μM uranyl-acetate present in the growth medium. Spent medium was concentrated 50 fold using a 3 kDa filter and was run on a denaturing SDS-PAGE gel. Labeled bands were identified using in gel tryptic digest MALDI.

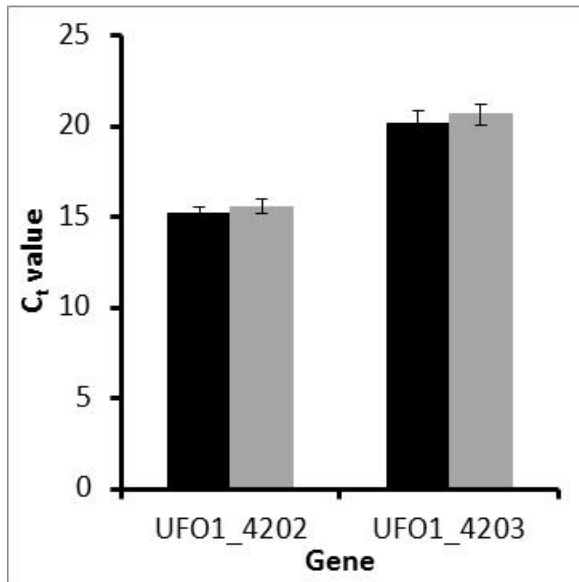

**Supplementary Figure 3: Reverse transcription-PCR of UBC genes.** Strain UFO1 was grown in modified R2 broth without (black) and with (grey) 50 μM uranyl-acetate present in the growth medium, before RNA isolation and reverse transcription-PCR analysis.

## References

1. **Liu C, Zachara JM, Foster NS, Strickland J.** 2007. Kinetics of reductive dissolution of hematite by bio-reduced anthraquinone-2, 6-disulfonate. *Envir Sci Tech* **41**:7730-7735.
